# Supplementary material
Source: MDPI journal article supplement (https://www.mdpi.com/2073-4441/14/11/1706)
Supplement: s1 [file s1]

**Table S1.** Spearman Rank Correlations (n=3) between amino acids, TPHs and the most significant PAHs compounds.

|                               | TPHs                 | Isoleucine           | Threonine            | Alanine              | Asparatic acid       | Glutamic acid        | Glycine              | Tyrosine             | Chrysene (CHY)       | Pyrene (PYR)         | Benzo(b)fluoranthene (BbF) | Dibenzo(a,h)anthracene (DahA) |
|-------------------------------|----------------------|----------------------|----------------------|----------------------|----------------------|----------------------|----------------------|----------------------|----------------------|----------------------|----------------------------|-------------------------------|
| TPHs                          |                      | 0.4264<br>p=0. 719   | 0.8962<br>p=0. 2927  | 0.7752<br>p=0. 4353  | 0.9563<br>p=0. 1889  | 0.9999<br>p=0. 0091  | 0.8012<br>p=0. 4084  | 0.9647<br>p=0. 1696  | -0.9747<br>p=0. 1435 | -0.4855<br>p=0. 6773 | -0.4752<br>p=0. 6848       | -0.4894<br>p=0. 6744          |
| Isoleucine                    | 0.4264<br>p=0.7196   |                      | 0.7834<br>p=0. 4269  | 0.9019<br>p=0. 2843  | 0.6722<br>p=0. 5307  | 0.4393<br>p=0. 7105  | 0.8829<br>p=0. 3112  | 0.6494<br>p=0. 5500  | -0.6177<br>p=0. 5761 | -0.9978<br>p=0. 0423 | -0.9985<br>p=0. 0348       | -0.9975<br>p=0. 0452          |
| Threonine                     | 0.8962<br>p=0. 2927  | 0.7834<br>p=0. 4269  |                      | 0.9750<br>p=0. 1426  | 0.9867<br>p=0. 1038  | 0.9024<br>p=0. 2835  | 0.9835<br>p=0. 1158  | 0.9814<br>p=0.1231   | -0.9727<br>p=0. 1492 | -0.8230<br>p=0. 3846 | -0.8162<br>p=0. 3921       | -0.8255<br>p=0. 3817          |
| Alanine                       | 0.7752<br>p=0. 4353  | 0.9019<br>p=0. 2843  | 0.9750<br>p=0. 1426  |                      | 0.9260<br>p=0. 2464  | 0.7842<br>p=0. 4262  | 0.9991<br>p=0. 0269  | 0.9141<br>p=0. 2657  | -0.8967<br>p=0. 2918 | -0.9286<br>p=0. 2420 | -0.9242<br>p=0. 2495       | -0.9303<br>p=0. 2391          |
| Asparatic acid                | 0.9563<br>p=0. 1889  | 0.6722<br>p=0. 5307  | 0.9867<br>p=0. 1038  | 0.9260<br>p=0. 2464  |                      | 0.9604<br>p=0. 1798  | 0.9411<br>p=0. 2195  | 0.9995<br>p=0. 0193  | -0.9975<br>p=0. 0454 | -0.7199<br>p=0. 4884 | -0.7116<br>p=0. 4959       | -0.7230<br>p=0. 4855          |
| Glutamic acid                 | 0.9999<br>p=0. 0091  | 0.4393<br>p=0. 7105  | 0.9024<br>p=0. 2835  | 0.7842<br>p=0. 4262  | 0.9604<br>p=0. 1798  |                      | 0.8097<br>p=0. 3993  | 0.9684<br>p=0. 1605  | -0.9778<br>p=0. 1343 | -0.4980<br>p=0. 6682 | -0.4877<br>p=0. 6757       | -0.5019<br>p=0. 6653          |
| Glycine                       | 0.8012<br>p=0. 4084  | 0.8829<br>p=0. 3112  | 0.9835<br>p=0. 1158  | 0.9991<br>p=0. 0269  | 0.9411<br>p=0. 2195  | 0.8097<br>p=0. 3993  |                      | 0.9304<br>p=0. 2389  | -0.9146<br>p=0. 2650 | -0.9121<br>p=0. 2688 | -0.9072<br>p=0. 2764       | -0.9140<br>p=0. 2660          |
| Tyrosine                      | 0.9647<br>p=0. 1696  | 0.6494<br>p=0. 5500  | 0.9814<br>p=0. 1231  | 0.9141<br>p=0. 2657  | 0.9995<br>p=0. 0193  | 0.9684<br>p=0. 1605  | 0.9304<br>p=0. 2389  |                      | -0.9992<br>p=0. 0261 | -0.6985<br>p=0. 5077 | -0.6900<br>p=0. 5152       | -0.7017<br>p=0. 5048          |
| Chrysene (CHY)                | -0.9747<br>p=0. 1435 | -0.6177<br>p=0. 5761 | -0.9727<br>p=0. 1492 | -0.8967<br>p=0. 2918 | -0.9975<br>p=0. 0454 | -0.9778<br>p=0. 1343 | -0.9146<br>p=0. 2650 | -0.9992<br>p=0. 0261 |                      | 0.6686<br>p=0. 5338  | 0.6597<br>p=0. 5413        | 0.6719<br>p=0. 5309           |
| Pyrene (PYR)                  | -0.4855<br>p=0.6773  | -0.9978<br>p=0.0423  | -0.8230<br>p=0.3846  | -0.9286<br>p=0.2420  | -0.7199<br>p=0.4884  | -0.4980<br>p=0.6682  | -0.9121<br>p=0.2688  | -0.6985<br>p=0.5077  | 0.6686<br>p=0.5338   |                      | 0.9999<br>p=0.0075         | 1.0000<br>p=0.0029            |
| Benzo(b)fluoranthene (BbF)    | -0.4752<br>p=0.6848  | -0.9985<br>p=0.0348  | -0.8162<br>p=0.3921  | -0.9242<br>p=0.2495  | -0.7116<br>p=0.4959  | -0.4877<br>p=0.6757  | -0.9072<br>p=0.2764  | -0.6900<br>p=0.5152  | 0.6597<br>p=0.5413   | 0.9999<br>p=0.0075   |                            | 0.9999<br>p=0.0104            |
| Dibenzo(a,h)anthracene (DahA) | -0.4894<br>p=0.6744  | -0.9975<br>p=0.0452  | -0.8255<br>p=0.3817  | -0.9303<br>p=0.2391  | -0.7230<br>p=0.4855  | -0.5019<br>p=0.6653  | -0.9140<br>p=0.2660  | -0.7017<br>p=0.5048  | 0.6719<br>p=0.5309   | 1.0000<br>p=0.0029   | 0.9999<br>p=0.0104         |                               |

P-Value Indicates significant non -zero correlation at 95.0% confidence level
